# Supplementary material
Source: HighWire-hosted journal article supplement (https://erj.ersjournals.com/content/59/5/2100449)

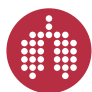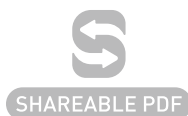

# Cardiac sarcoidosis: systematic review of the literature on corticosteroid and immunosuppressive therapies

Julien Stievenart <sup>1</sup>, Guillaume Le Guenno <sup>2</sup>, Marc Ruivard <sup>2</sup>, Virginie Rieu <sup>2</sup>, Marc André <sup>1,3</sup> and Vincent Grobost <sup>2</sup>

<sup>1</sup>Internal Medicine Dept, Hôpital Gabriel Montpied, Clermont-Ferrand University Hospital, Clermont-Ferrand, France. <sup>2</sup>Internal Medicine Dept, Hôpital Estaing, Clermont-Ferrand University Hospital, Clermont-Ferrand, France. <sup>3</sup>Université Clermont Auvergne, Clermont-Ferrand University Hospital, Inserm U1071, INRA USC2018, M2iSH, Clermont-Ferrand, France.

Corresponding author: Julien Stievenart ([jstievenart@chu-clermontferrand.fr](mailto:jstievenart@chu-clermontferrand.fr))

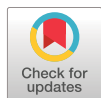

Shareable abstract (@ERSpublications)

**Corticosteroids are the mainstay treatment for cardiac sarcoidosis. Conventional immunosuppressive agents might be of interest at diagnosis. Cohort studies are clearly heterogeneous. Large cohort and prospective studies using “strong” end-points are lacking.** <https://bit.ly/3t9Rv8O>

**Cite this article as:** Stievenart J, Le Guenno G, Ruivard M, *et al.* Cardiac sarcoidosis: systematic review of the literature on corticosteroid and immunosuppressive therapies. *Eur Respir J* 2022; 59: 2100449 [DOI: 10.1183/13993003.00449-2021].

This single-page version can be shared freely online.

Copyright ©The authors 2022.

This version is distributed under the terms of the Creative Commons Attribution Non-Commercial Licence 4.0. For commercial reproduction rights and permissions contact [permissions@ersnet.org](mailto:permissions@ersnet.org)

Received: 12 Feb 2021  
Accepted: 26 Aug 2021

## Abstract

**Background** Cardiac sarcoidosis (CS) is a life-threatening condition in which clear recommendations are lacking. We aimed to systematically review the literature on cardiac sarcoidosis treated by corticosteroids and/or immunosuppressive agents in order to update the management of CS.

**Methods** Using PubMed, Embase and Cochrane Library databases, we found original articles on corticosteroid and standard immunosuppressive therapies for CS that provided at least a fair Scottish Intercollegiate Guidelines Network (SIGN) overall assessment of quality and we analysed the relapse rate, major cardiac adverse events (MACEs) and adverse events. We based our methods on the PRISMA statement and checklist.

**Results** We retrieved 21 studies. Mean quality provided by SIGN assessment was 6.8 out of 14 (range 5–9). Corticosteroids appeared to have a positive impact on left ventricular function, atrioventricular block and ventricular arrhythmias. For corticosteroids alone, nine studies (45%, n=351) provided data on relapses, representing an incidence of 34% (n=119). Three studies (14%, n=73) provided data on MACEs (n=33), representing 45% of MACEs in patients treated by corticosteroid alone. Nine studies provided data on adjunctive immunosuppressive therapy, of which four studies (n=78) provided data on CS relapse, representing an incidence of 33% (n=26). Limitations consisted of no randomised control trial retrieved and unclear data on MACEs in patients treated by combined immunosuppressive agents and corticosteroids.

**Conclusion** Corticosteroids should be started early after diagnosis but the exact scheme is still unclear. Studies concerning adjunctive conventional immunosuppressive therapies are lacking and benefits of adjunctive immunosuppressive therapies are unclear. Homogenous data on CS long-term outcomes under corticosteroids, immunosuppressive therapies and other adjunctive therapies are lacking.

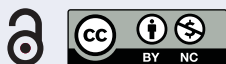

Supplement: inline-supplementary-material-4 [file inline-supplementary-material-4.pdf]
