# Supplementary material
Source: HighWire-hosted journal article supplement (https://erj.ersjournals.com/content/59/5/2100449)
Supplement: inline-supplementary-material-1 [file inline-supplementary-material-1.pdf]

## **Appendix 1. Search Strategy**

### **PubMed and Embase :**

("sarcoidosis"[MH] OR "besnier boeck schaumann's disease"[TW] OR "benign lymphogranulomatosis"[TW] OR "boeck's disease"[TW] OR "besnier-boeck-schaumann's disease"[TW] OR "besnier-boeck-schaumann syndrome"[TW] OR "besnier boeck schaumann syndrome"[TW] OR "disease schaumann"[TW] OR "besnier-boeck-schaumann disease"[TW] OR "lymphogranulomatosis"[TW] OR "boeck's sarcoid"[TW] OR "boeck disease"[TW] OR "sarcoid reaction"[TW] OR "boecks sarcoidosis"[TW] OR "besnier boeck syndrome"[TW] OR "boeck sarcoid"[TW] OR "boeck; disease"[TW] OR "darier-roussy sarcoid"[TW] OR "besnier boeck disease"[TW] OR "uveoparotid fever"[TW] OR "lymphogranulomatosis; benign"[TW] OR "boeck's sarcoidosis"[TW] OR "besnier boeck schaumann disease"[TW] OR "schaumann syndrome"[TW] OR "lymphogranuloma benignum"[TW] OR "schaumann's disease"[TW] OR "lymphogranulomatosis (benign)"[TW] OR "sarcoidosis"[TW] OR "boeck; sarcoid"[TW] OR "lymphogranulomatosis benign"[TW] OR "benign; lymphogranulomatosis"[TW] OR "schaumann disease"[TW] OR "besnier-boeck disease"[TW] OR "sarcoid boeck"[TW] OR "sarcoid; boeck"[TW] OR "sarcoidoses"[TW] OR "sarcoid"[TW]) AND ("heart"[MH] OR "heart"[TW] OR "hearts"[TW] OR "cardiac"[TW] OR "heart diseases"[MH] OR "cardiac events"[TW] OR "diseases heart"[TW] OR "disease cardiac"[TW] OR "disease;heart"[TW] OR "cardiac disorder"[TW] OR "cardiac diseases"[TW] OR "dysfunction myocardial"[TW] OR "myocardial depression"[TW] OR "diseases of the heart"[TW] OR "disorder of heart"[TW] OR "cardiac event"[TW] OR "dysfunction;heart"[TW] OR "heart disorder"[TW] OR "disease, heart"[TW] OR "dysfunction heart"[TW] OR "heart dysfunction"[TW] OR "diseases, cardiac"[TW] OR "diseases, heart"[TW] OR "dysfunction; myocardial"[TW] OR "disease,

cardiac"[TW] OR "heart diseases"[TW] OR "cardiac disorders"[TW] OR "diseases cardiac"[TW] OR "myocardial dysfunction"[TW] OR "cardiovascular diseases"[TW] OR "morbus; cordis"[TW] OR "heart disorders"[TW] OR "dysfunction; heart"[TW] OR "cardiac therapy"[TW] OR "heart disease"[TW] OR "heart trouble"[TW] OR "cardiac disease"[TW] OR "disease heart"[TW] OR "cardiopathy"[TW] OR "morbus cordis"[TW]) AND ("corticoides"[TW] OR "steroids"[MH] OR "steroids"[TW] OR "steroid"[TW] OR "anti-inflammatory agents"[PA] OR "anti-inflammatory agents"[TW] OR "mineralocorticoids"[MH] OR "glucocorticoids"[PA] OR "glucocorticoids"[TW] OR "mineralocorticoids"[PA] OR "mineralocorticoids"[TW] OR "therapy"[SH] OR "therapeutic use"[SH] OR "pharmacology"[SH] OR "drug therapy"[MH] OR "therapy"[TW] OR "treatment"[TW] OR "therapeutics"[MeSH Terms] OR "therapeutic\*"[TW] OR "adrenal cortex hormones"[MH] OR "corticosteroids"[TW] OR "corticoids"[TW] OR "adrenal cortex hormones"[TW] OR "immunosuppressant"[TW] OR "immunosuppressive"[TW] OR "immunosuppressants"[TW] OR "azathioprine"[MH] OR "azathioprine"[TW] OR "imurel"[TW] OR "azothioprine"[TW] OR "prednisone"[TW] OR "prednisone"[MH] OR "prednisolone"[MH] OR "prednisolone"[TW] OR "methotrexate"[MH] OR "methotrexatum"[TW] OR "mexate"[TW] OR "n-[4-[(2,4-diamino-6-pteridiny)methyl]methylamino]benzoyl]-l-glutamic acid"[TW] OR "methotrexate"[TW] OR "yl5fz2y5u1"[TW] OR "cl 14377"[TW] OR "adverse reaction to methotrexate"[TW] OR "methotrexate sodium"[TW] OR "alpha-methopterin"[TW] OR "sodium methotrexate"[TW] OR "metotrexato"[TW] OR "4-amino-10-methylfolic acid"[TW] OR "mtx - methotrexate"[TW] OR "amethopterin"[TW] OR "59-05-2"[TW] OR "methotrexate hydrate"[TW] OR "methotrexate poisoning"[TW] OR "cyclophosphamide"[MH] OR "cytoxan"[TW] OR "mitoxan"[TW] OR "ciclofosfamide"[TW] OR "neosar"[TW] OR "procytox"[TW] OR "endoxan"[TW] OR "clafen"[TW] OR "cyclophosphamidum"[TW] OR

"sendoxan"[TW] OR "b518"[TW] OR "cyclophosphamide monohydrate"[TW] OR "claphene"[TW] OR "cp monohydrate"[TW] OR "cyclophosphamide anhydrous"[TW] OR "8n3dw7272p"[TW] OR "cpm - cyclophosphamide"[TW] OR "ctx - cyclophosphamide"[TW] OR "cyclophosphanum"[TW] OR "nsc26271"[TW] OR "bis(2-chloroethyl)phosphoramidic cyclic propanolamide ester monohydrate"[TW] OR "cytophosphane"[TW] OR "ciclofosfamida"[TW] OR "cyclophosphane"[TW] OR "(-)-cyclophosphamide"[TW] OR "nsc 26271"[TW] OR "revimmune"[TW] OR "b 518"[TW] OR "cyclophosphan"[TW] OR "nsc-26271"[TW] OR "50-18-0"[TW] OR "cyclophosphamide"[TW] OR "b-518"[TW] OR "isofosfamide"[TW] OR "Leflunomide"[MH] OR "leflunomide"[TW] OR "hwa486"[TW] OR "hwa-486"[TW] OR "g162gk9u4w"[TW] OR "Leflunomide"[TW] OR "mycophenolic acid"[MH] OR "hu9dx48n0t"[TW] OR "rs-61443"[TW] OR "cellcept"[TW] OR "mycophenolic acid"[TW] OR "rs61443"[TW] OR "mycophenolic acid morpholinoethyl ester"[TW] OR "acidum mycophenolicum"[TW] OR "sodium salt of mycophenolic acid"[TW] OR "myfortic"[TW] OR "mycophenolate mofetil"[TW] OR "24280-93-1"[TW] OR "sodium mycophenolate"[TW] OR "mycophenolate mofetil hydrochloride"[TW] OR "acide mycophenolique"[TW] OR "acido micofenolico"[TW] OR "mycophenolate"[TW] OR "rs 61443"[TW] OR "chloroquine"[MH] OR "adverse reaction to chloroquine"[TW] OR "886u3h6uff"[TW] OR "chloroquine sulphate"[TW] OR "arechine"[TW] OR "chloroquine measurement"[TW] OR "chloroquine sulfate"[TW] OR "aralen"[TW] OR "chloroquine"[TW] OR "khingamin"[TW] OR "chingamin"[TW] OR "nivaquine"[TW] OR "54-05-7"[TW] OR "chlorochin"[TW] OR "Hydroxychloroquine"[TW])
