# Supplementary material
Source: HighWire-hosted journal article supplement (https://erj.ersjournals.com/content/59/5/2100449)
Supplement: inline-supplementary-material-2 [file inline-supplementary-material-2.pdf]

## Supplemental Methods 2. SIGN Checklist for Cohort studies

|                                                                                                                                                                                                                                                                                                                                                                                                                                                        |                                                                                                                                                  |                                                                    |                                                                        |
|--------------------------------------------------------------------------------------------------------------------------------------------------------------------------------------------------------------------------------------------------------------------------------------------------------------------------------------------------------------------------------------------------------------------------------------------------------|--------------------------------------------------------------------------------------------------------------------------------------------------|--------------------------------------------------------------------|------------------------------------------------------------------------|
|                                                                                                                                                                                                                                                                                                                                                                        |                                                                                                                                                  | <b>METHODOLOGY CHECKLIST 3: COHORT STUDIES</b>                     |                                                                        |
| Study identification (Include author, title, year of publication, journal title, pages)                                                                                                                                                                                                                                                                                                                                                                |                                                                                                                                                  |                                                                    |                                                                        |
| Guideline topic:                                                                                                                                                                                                                                                                                                                                                                                                                                       |                                                                                                                                                  | Key Question No:                                                   | Reviewer:                                                              |
| <b>Before</b> completing this checklist, consider: <ol style="list-style-type: none"> <li>Is the paper really a cohort study? If in doubt, check the study design algorithm available from SIGN and make sure you have the correct checklist.</li> <li>Is the paper relevant to key question? Analyse using PICO (Patient or Population Intervention Comparison Outcome). IF NO REJECT (give reason below). IF YES complete the checklist..</li> </ol> |                                                                                                                                                  |                                                                    |                                                                        |
| Reason for rejection: 1. Paper not relevant to key question <input type="checkbox"/> 2. Other reason <input type="checkbox"/> (please specify):<br><b>Please note that a retrospective study (ie a database or chart study) cannot be rated higher than +.</b>                                                                                                                                                                                         |                                                                                                                                                  |                                                                    |                                                                        |
| <b>Section 1: Internal validity</b>                                                                                                                                                                                                                                                                                                                                                                                                                    |                                                                                                                                                  |                                                                    |                                                                        |
| <i>In a well conducted cohort study:</i>                                                                                                                                                                                                                                                                                                                                                                                                               |                                                                                                                                                  | <b>Does this study do it?</b>                                      |                                                                        |
| 1.1                                                                                                                                                                                                                                                                                                                                                                                                                                                    | The study addresses an appropriate and clearly focused question.                                                                                 | Yes <input type="checkbox"/>                                       | No <input type="checkbox"/><br>Can't say <input type="checkbox"/>      |
| <b>SELECTION OF SUBJECTS</b>                                                                                                                                                                                                                                                                                                                                                                                                                           |                                                                                                                                                  |                                                                    |                                                                        |
| 1.2                                                                                                                                                                                                                                                                                                                                                                                                                                                    | The two groups being studied are selected from source populations that are comparable in all respects other than the factor under investigation. | Yes <input type="checkbox"/><br>Can't say <input type="checkbox"/> | No <input type="checkbox"/><br>Does not apply <input type="checkbox"/> |
| 1.3                                                                                                                                                                                                                                                                                                                                                                                                                                                    | The study indicates how many of the people asked to take part did so, in each of the groups being studied.                                       | Yes <input type="checkbox"/>                                       | No <input type="checkbox"/><br>Does not apply <input type="checkbox"/> |
| 1.4                                                                                                                                                                                                                                                                                                                                                                                                                                                    | The likelihood that some eligible subjects might have the outcome at the time of enrolment is assessed and taken into account in the analysis.   | Yes <input type="checkbox"/><br>Can't say <input type="checkbox"/> | No <input type="checkbox"/><br>Does not apply <input type="checkbox"/> |
| 1.5                                                                                                                                                                                                                                                                                                                                                                                                                                                    | What percentage of individuals or clusters recruited into each arm of the study dropped out before the study was completed.                      |                                                                    |                                                                        |

|                                            |                                                                                                                                               |                                            |                                         |
|--------------------------------------------|-----------------------------------------------------------------------------------------------------------------------------------------------|--------------------------------------------|-----------------------------------------|
| 1.6                                        | Comparison is made between full participants and those lost to follow up, by exposure status.                                                 | Yes <input type="checkbox"/>               | No <input type="checkbox"/>             |
|                                            |                                                                                                                                               | Can't say <input type="checkbox"/>         | Does not apply <input type="checkbox"/> |
| ASSESSMENT                                 |                                                                                                                                               |                                            |                                         |
| 1.7                                        | The outcomes are clearly defined.                                                                                                             | Yes <input type="checkbox"/>               | No <input type="checkbox"/>             |
|                                            |                                                                                                                                               | Can't say <input type="checkbox"/>         |                                         |
| 1.8                                        | The assessment of outcome is made blind to exposure status. If the study is retrospective this may not be applicable.                         | Yes <input type="checkbox"/>               | No <input type="checkbox"/>             |
|                                            |                                                                                                                                               | Can't say <input type="checkbox"/>         | Does not apply <input type="checkbox"/> |
| 1.9                                        | Where blinding was not possible, there is some recognition that knowledge of exposure status could have influenced the assessment of outcome. | Yes <input type="checkbox"/>               | No <input type="checkbox"/>             |
|                                            |                                                                                                                                               | Can't say <input type="checkbox"/>         | <input type="checkbox"/>                |
| 1.10                                       | The method of assessment of exposure is reliable.                                                                                             | Yes <input type="checkbox"/>               | No <input type="checkbox"/>             |
|                                            |                                                                                                                                               | Can't say <input type="checkbox"/>         |                                         |
| 1.11                                       | Evidence from other sources is used to demonstrate that the method of outcome assessment is valid and reliable.                               | Yes <input type="checkbox"/>               | No <input type="checkbox"/>             |
|                                            |                                                                                                                                               | Can't say <input type="checkbox"/>         | Does not apply <input type="checkbox"/> |
| 1.12                                       | Exposure level or prognostic factor is assessed more than once.                                                                               | Yes <input type="checkbox"/>               | No <input type="checkbox"/>             |
|                                            |                                                                                                                                               | Can't say <input type="checkbox"/>         | Does not apply <input type="checkbox"/> |
| CONFOUNDING                                |                                                                                                                                               |                                            |                                         |
| 1.13                                       | The main potential confounders are identified and taken into account in the design and analysis.                                              | Yes <input type="checkbox"/>               | No <input type="checkbox"/>             |
|                                            |                                                                                                                                               | Can't say <input type="checkbox"/>         |                                         |
| STATISTICAL ANALYSIS                       |                                                                                                                                               |                                            |                                         |
| 1.14                                       | Have confidence intervals been provided?                                                                                                      | Yes <input type="checkbox"/>               | No <input type="checkbox"/>             |
| SECTION 2: OVERALL ASSESSMENT OF THE STUDY |                                                                                                                                               |                                            |                                         |
| 2.1                                        | How well was the study done to minimise the risk of bias or confounding?                                                                      | High quality (++) <input type="checkbox"/> |                                         |
|                                            |                                                                                                                                               | Acceptable (+) <input type="checkbox"/>    |                                         |
|                                            |                                                                                                                                               | Unacceptable – reject 0                    |                                         |

|     |                                                                                                                                                                                                                    |                                                                    |                             |
|-----|--------------------------------------------------------------------------------------------------------------------------------------------------------------------------------------------------------------------|--------------------------------------------------------------------|-----------------------------|
| 2.2 | Taking into account clinical considerations, your evaluation of the methodology used, and the statistical power of the study, do you think there is clear evidence of an association between exposure and outcome? | Yes <input type="checkbox"/><br>Can't say <input type="checkbox"/> | No <input type="checkbox"/> |
| 2.3 | Are the results of this study directly applicable to the patient group targeted in this guideline?                                                                                                                 | Yes <input type="checkbox"/> No <input type="checkbox"/>           |                             |
| 2.4 | <b>Notes.</b> Summarise the authors conclusions. Add any comments on your own assessment of the study, and the extent to which it answers your question and mention any areas of uncertainty raised above.         |                                                                    |                             |
