# Supplementary material
Source: HighWire-hosted journal article supplement (https://erj.ersjournals.com/content/59/5/2100449)
Supplement: inline-supplementary-material-3 [file inline-supplementary-material-3.pdf]

**Supplemental Table S1. Corticosteroids treatment regimen in selected studies**

| First author        | Corticosteroid regimen                                                                                                                                                                   |
|---------------------|------------------------------------------------------------------------------------------------------------------------------------------------------------------------------------------|
| Myoren (21)         | Prednisolone 30 mg/d for 4 weeks, tapered to 5 - 10 mg over 6 months                                                                                                                     |
| Chapelon-Abric (37) | Prednisolone 0,25 - 1,5 mg/kg/d for 6 - 8 weeks, tapered (in case of response) to less than 10 mg/d                                                                                      |
| Chapelon-Abric (38) | Prednisolone 1 mg/kg/d, tapered (in case of complete or partial response) to less than 10 mg/d over several months                                                                       |
| Zhou (30)           | Prednisone 20 - 40 mg/d, tapered every 6-8 weeks based on individual response until 5 - 10 mg/d                                                                                          |
| Orii (39)           | Prednisolone 30 mg/d for 4 weeks, tapered to 10 mg/d within 8 weeks, maintenance dose of 10 mg/d                                                                                         |
| Takaya (19)         | Prednisone 30 - 40 mg/d, tapered to 5 - 10 mg/d over a period of 6 to 12 months                                                                                                          |
| Nagai (17)          | Prednisolone initial dose was $29,5 \pm 4,0$ mg, no protocol provided                                                                                                                    |
| Nagai (18)          | Prednisolone 30 mg/d, tapered to 5 mg/d                                                                                                                                                  |
| Kato (40)           | Prednisolone 30 - 40 mg/d, tapered by 5 mg every 4 weeks until a maintenance dose of 4 - 10 mg/d                                                                                         |
| Padala (27)         | Prednisone 30 - 40 mg/d, one month at least, then tapered based on individual responsiveness                                                                                             |
| Takaya (20)         | Prednisone 30 - 40 mg/d, tapered over a period of 6 - 12 months to maintenance dose of 5 - 10 mg/d                                                                                       |
| Chiu (41)           | Prednisolone 60 mg/d for 2 months, tapered gradually to maintenance dose of 10 mg/d                                                                                                      |
| Yazaki (22)         | Two groups : high dose ( $\geq 40$ mg/d, $n=30$ , average dose $54 \pm 9$ mg/d) and low dose ( $\leq 30$ mg/d, average dose $29 \pm 9$ mg/d), tapered to a maintenance dose of 5-15 mg/d |
| Yodogawa (28)       | Prednisone 30 mg/d, tapered over 6 months to maintenance dosage of 5 - 10 mg/d                                                                                                           |
| Takaya (42)         | Prednisone 30 - 40 mg/d, tapered over a period of 6-12 months to maintenance dose of 5 - 10 mg/d                                                                                         |
| Naruse (43)         | 30 mg/d for 4 weeks, tapered by 5 mg/d every 2 - 4 weeks, until maintenance dose of 5 - 10 mg/d                                                                                          |
| Yalagudri (11)      | Prednisolone 1 mg/kg/d, maximum 60 mg/d, for 8 weeks, tapered over a period of 3 - 4 months before stopping                                                                              |
| Segawa (44)         | 30 mg/d for 4 weeks, tapered by 5 mg/d every 2 weeks, until 20 mg/d during hospitalization, then tapered by 5 mg every 2 - 4 weeks until maintenance dose of 5-10 mg/d                   |
| Ballul (10)         | Prednisone 60 (20 - 100) mg/d                                                                                                                                                            |
| Nagai (31)          | Prednisolone 30 - 60 mg/d as initial dose                                                                                                                                                |
| Kandolin (45)       | Prednisone 0,5- 1 mg/kg/d, tapered over 6 months to 10 - 20 mg/d. Slowly discontinued after 12 months, if LV function was stable                                                         |
